# Supplementary material for: A simulation study on the phase transition behavior of solid nitrogen under extreme conditions
Source: Royal Society of Chemistry journal article supplement (doi:10.1039/d3cp00602f), 2023-01-01
Supplement: d3cp00602f1.pdf [file d3cp00602f1.pdf]

## Supporting Information

### A simulation study on phase transition behavior of solid nitrogen at extreme conditions

Han Qin <sup>a</sup>, Sheng-Hai Zhu <sup>b,\*</sup>, Zhen Jiao <sup>c</sup>, Fu-Sheng Liu <sup>d</sup>, Zheng-Tang Liu <sup>e</sup>, Qi-Jun

Liu <sup>d,†</sup>

<sup>a</sup> School of Science, Key Laboratory of High Performance Scientific Computation,  
Xihua University, Chengdu 610039, China

<sup>b</sup> Institute of Atomic and Molecular Physics, Sichuan University, Chengdu 610065,  
China

<sup>c</sup> Physics of Interfaces and Nanomaterials, MESA Institute for Nanotechnology,  
University of Twente, P.O. Box 217, 7500AE Enschede, The Netherlands

<sup>d</sup> Bond and Band Engineering Group, School of Physical Science and Technology,  
Southwest Jiaotong University, Chengdu 610031, China

<sup>e</sup> State Key Laboratory of Solidification Processing, Northwestern Polytechnical  
University, Xi'an 710072, China

---

\* Corresponding author. Email: zhushenghai@hotmail.com

† Corresponding author. Email: qijunliu@home.swjtu.edu.cn

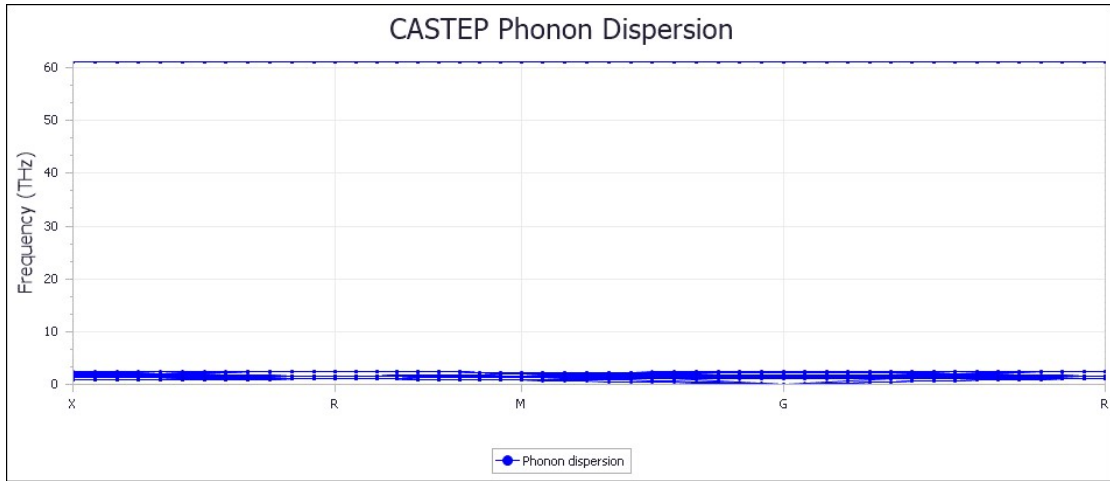

$\alpha$ -N<sub>2</sub> with  $Pa\bar{3}$  at 0 GPa

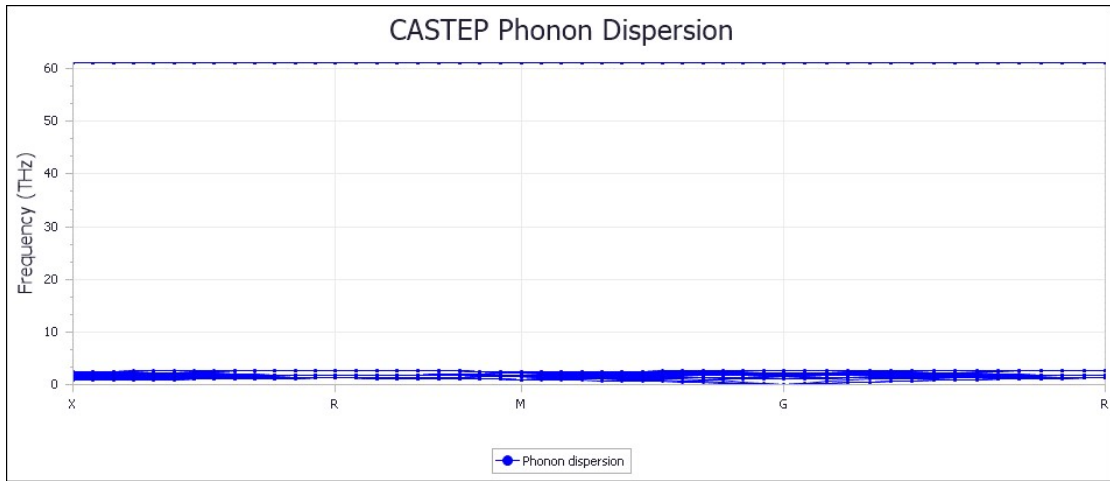

$\alpha$ -N<sub>2</sub> with  $Pa\bar{3}$  at 0.1 GPa

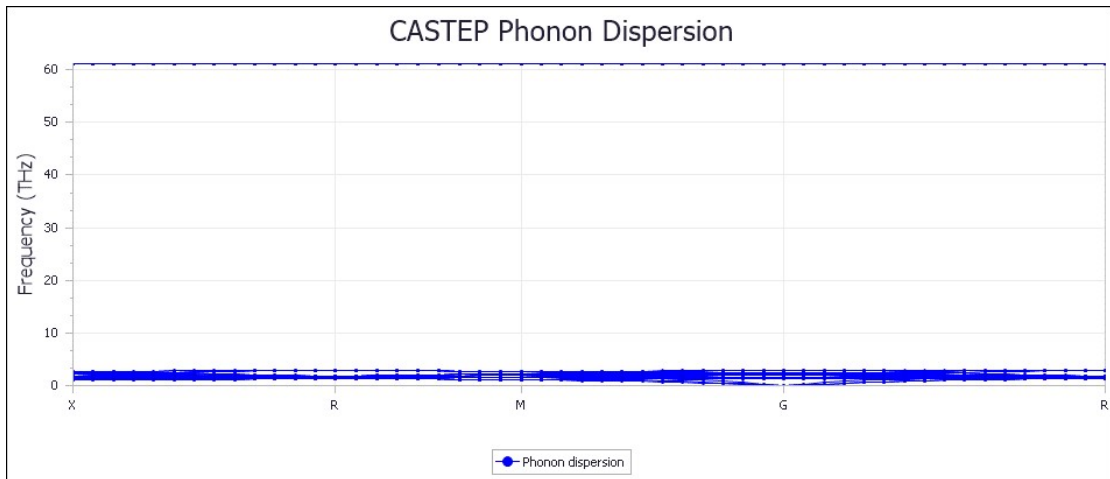

$\alpha\text{-N}_2$  with  $Pa\bar{3}$  at 0.2 GPa

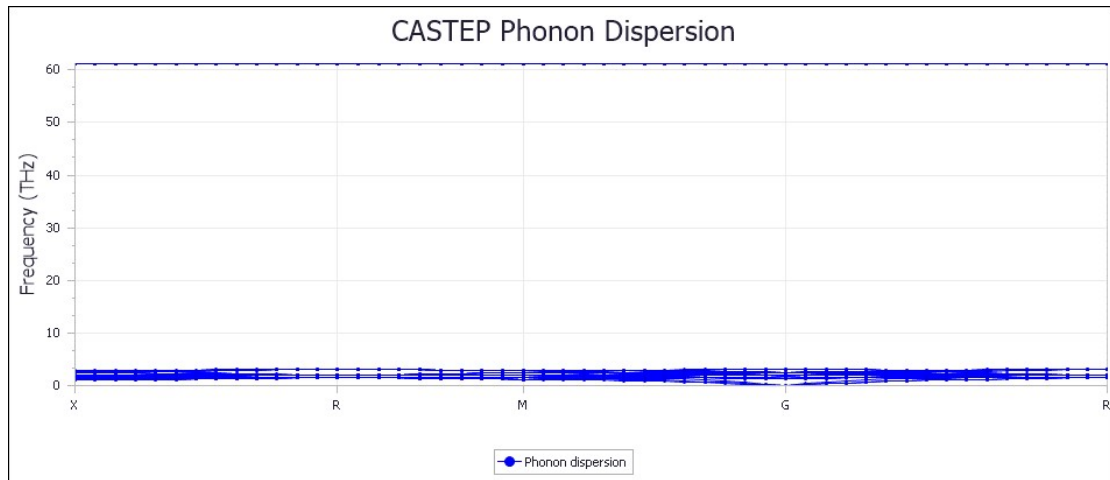

$\alpha\text{-N}_2$  with  $Pa\bar{3}$  at 0.3 GPa

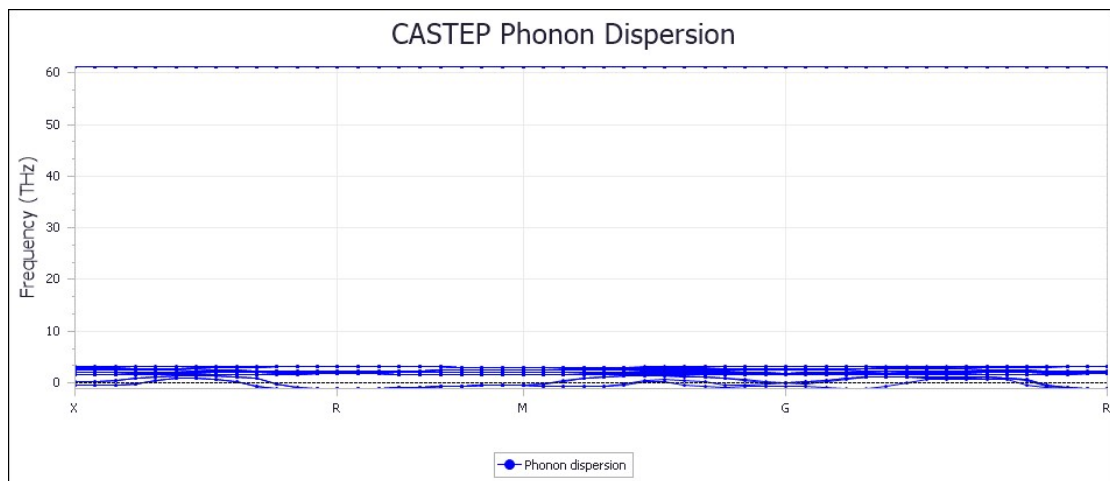

$\alpha\text{-N}_2$  with  $Pa\bar{3}$  at 0.4 GPa

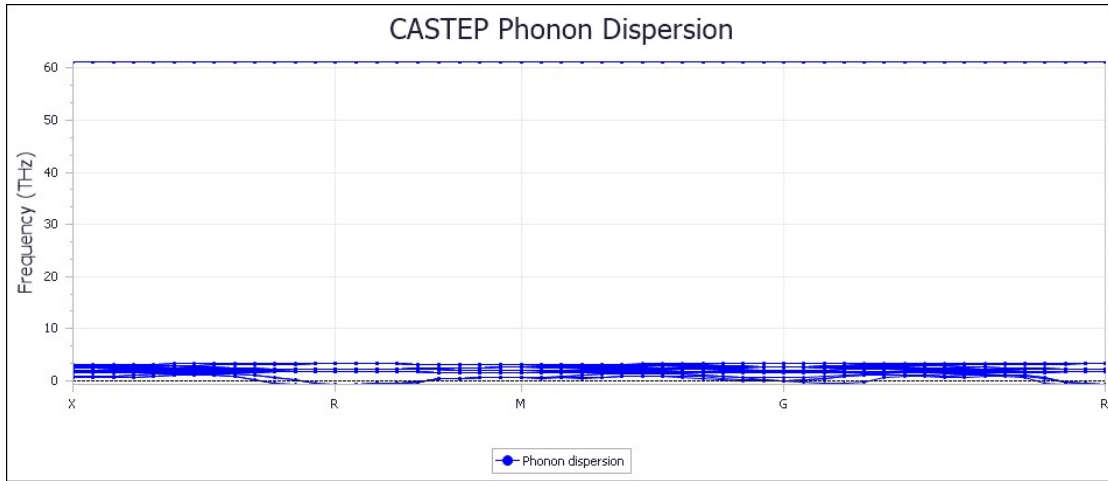

$\alpha\text{-N}_2$  with  $Pa\bar{3}$  at 0.5 GPa

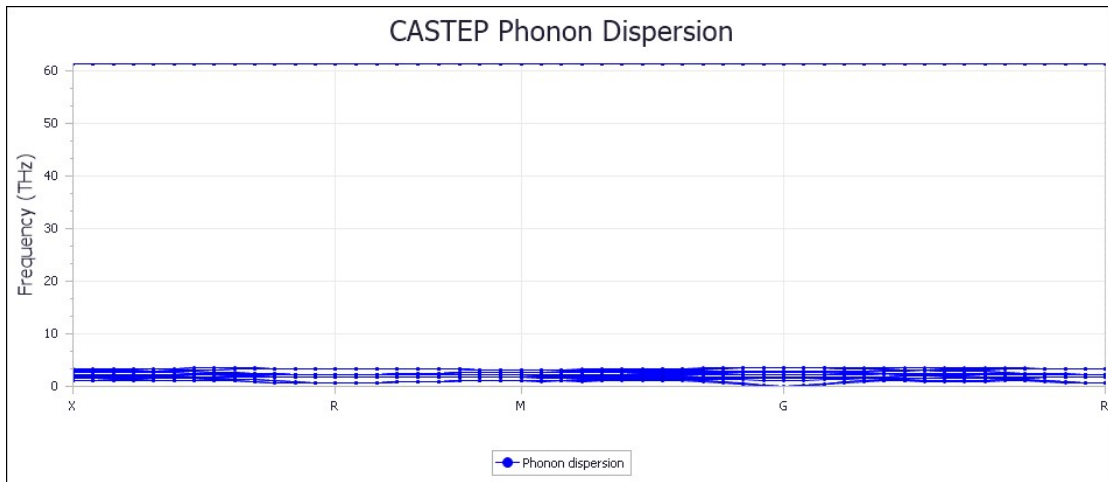

$\alpha\text{-N}_2$  with  $Pa\bar{3}$  at 0.6 GPa

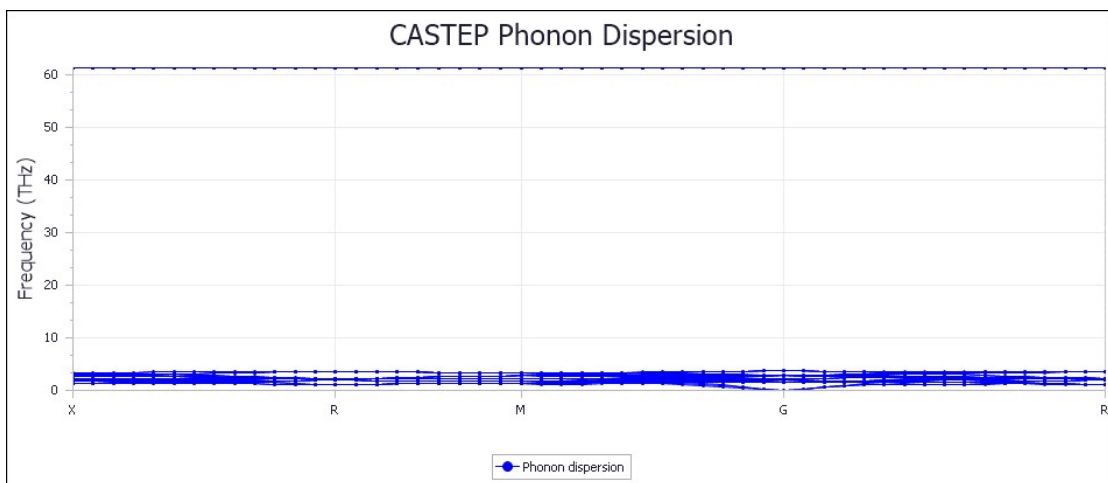

$\alpha\text{-N}_2$  with  $Pa\bar{3}$  at 0.7 GPa

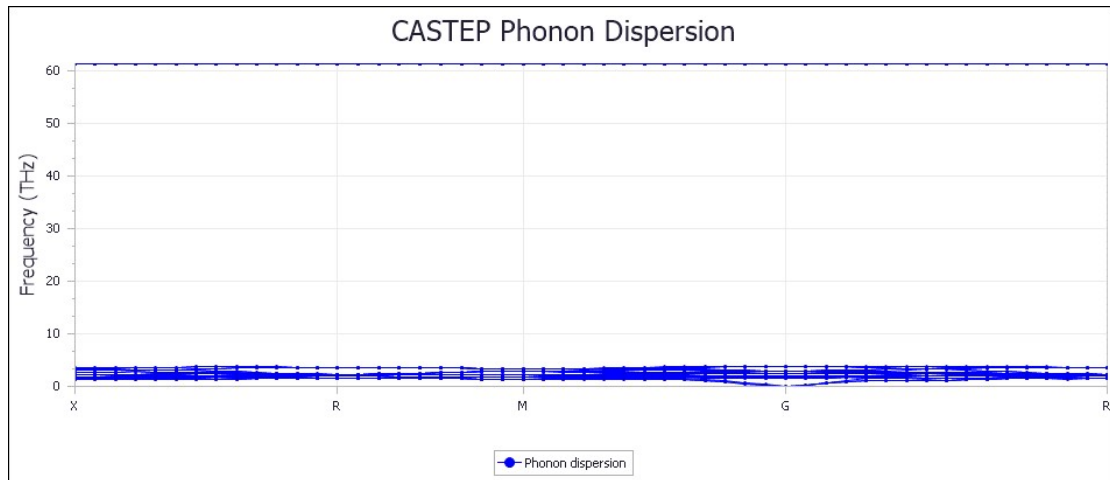

$\alpha$ -N<sub>2</sub> with  $Pa\bar{3}$  at 0.8 GPa

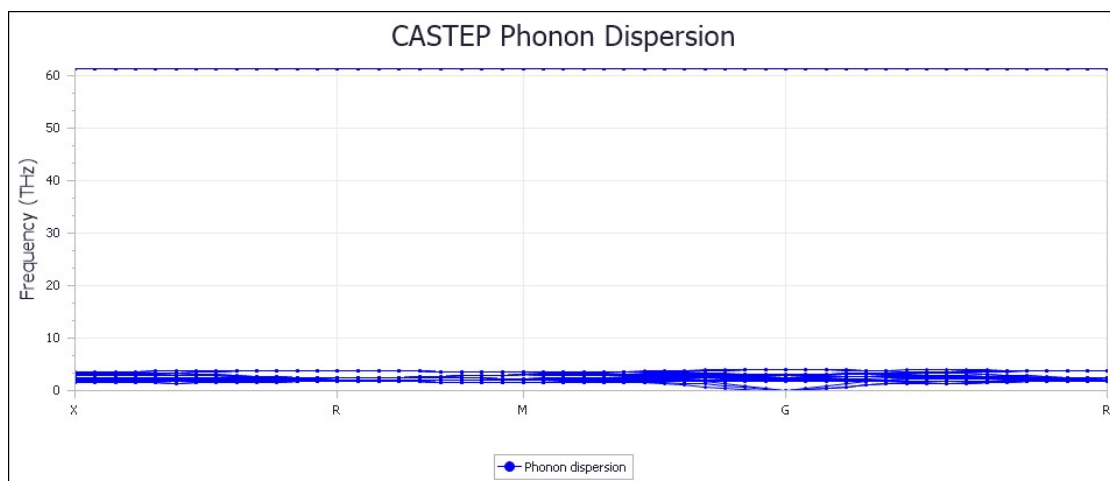

$\alpha$ -N<sub>2</sub> with  $Pa\bar{3}$  at 0.9 GPa

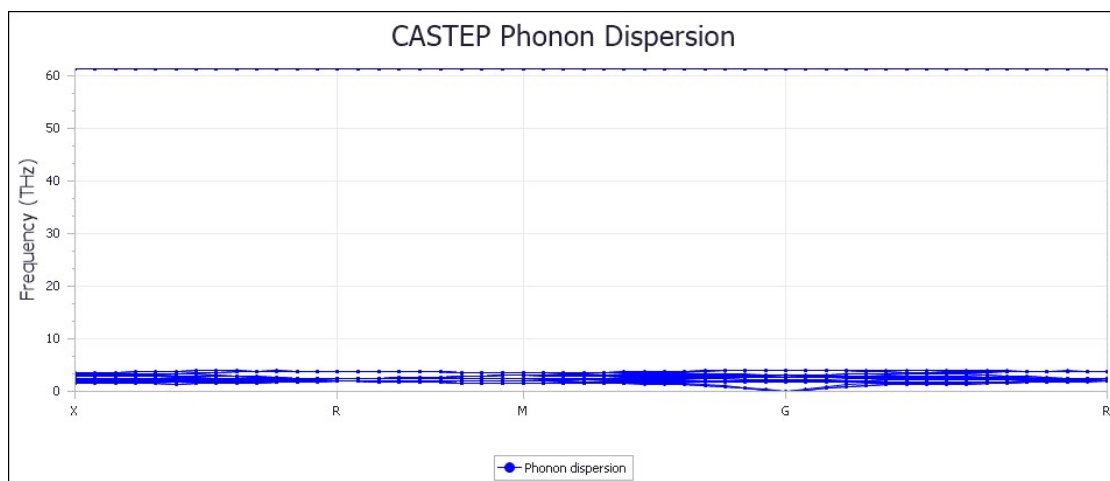

$\alpha\text{-N}_2$  with  $Pa^3$  at 1 GPa

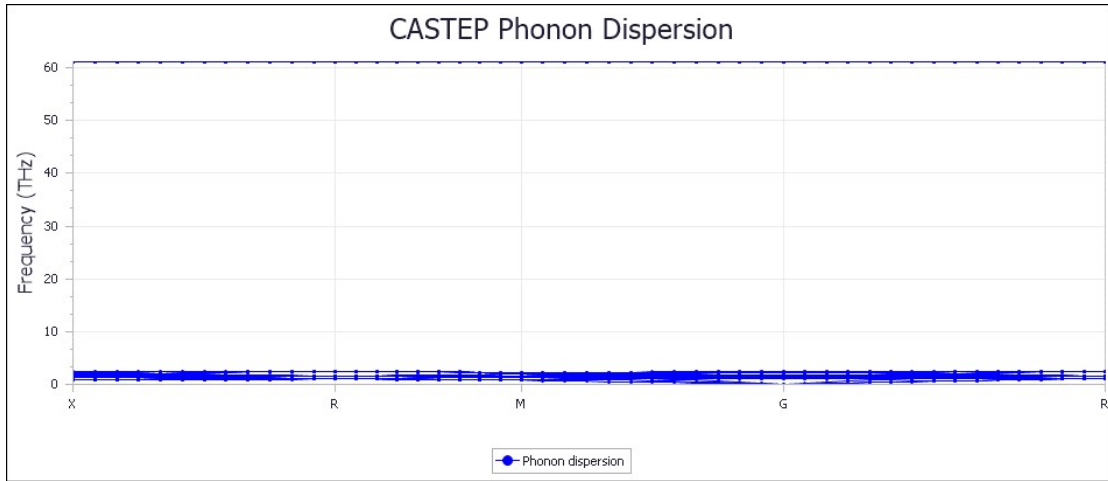

$\alpha$ -N<sub>2</sub> with  $P2_13$  at 0 GPa

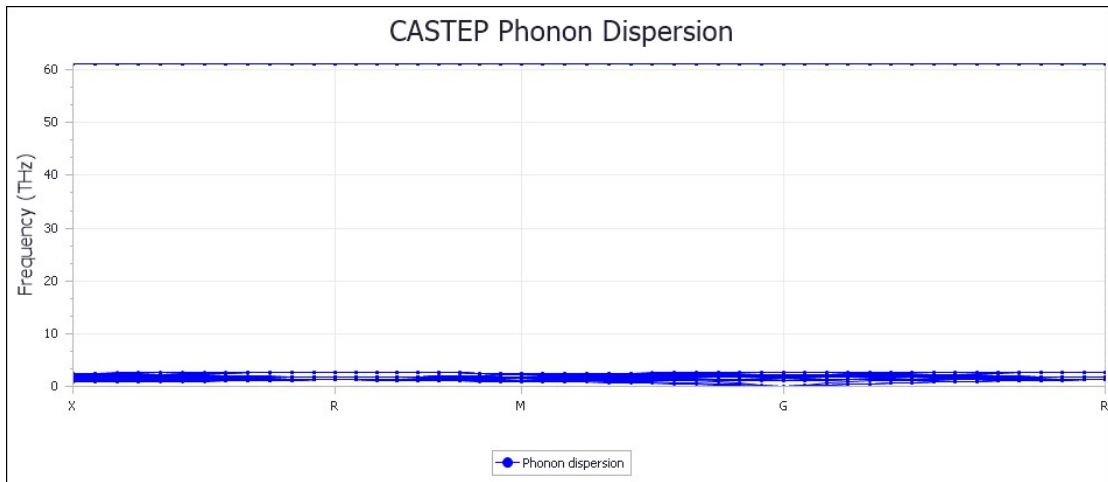

$\alpha$ -N<sub>2</sub> with  $P2_13$  at 0.1 GPa

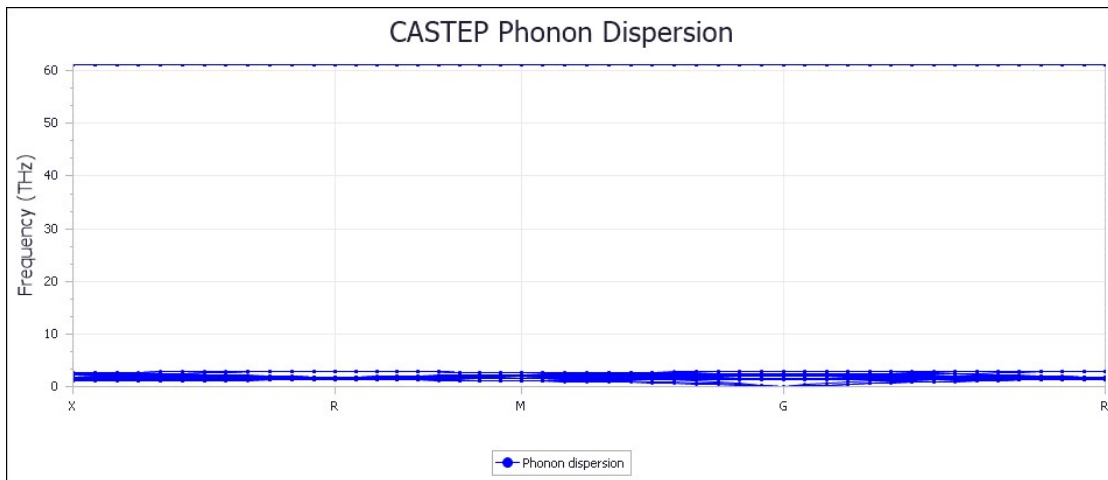

$\alpha$ -N<sub>2</sub> with  $P2_13$  at 0.2 GPa

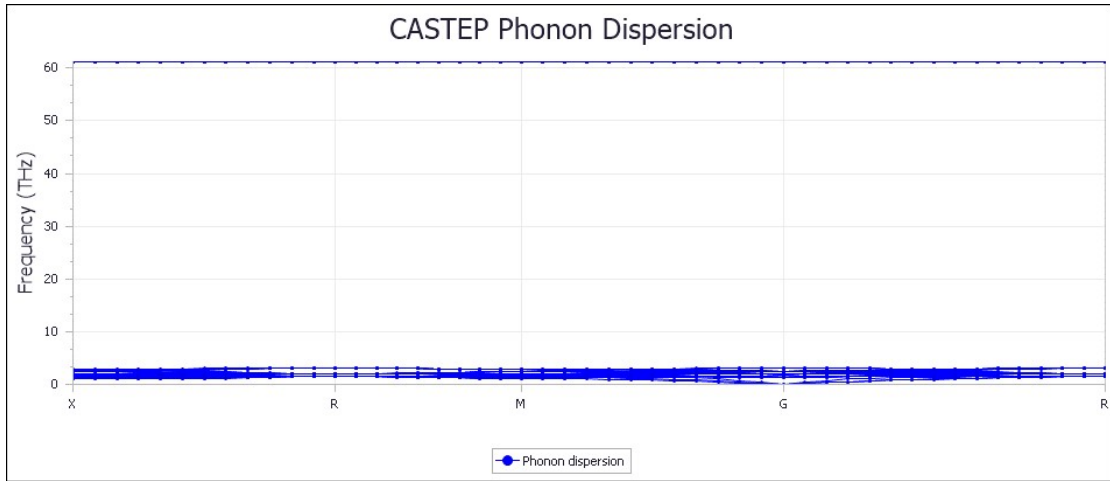

$\alpha$ -N<sub>2</sub> with  $P2_13$  at 0.3 GPa

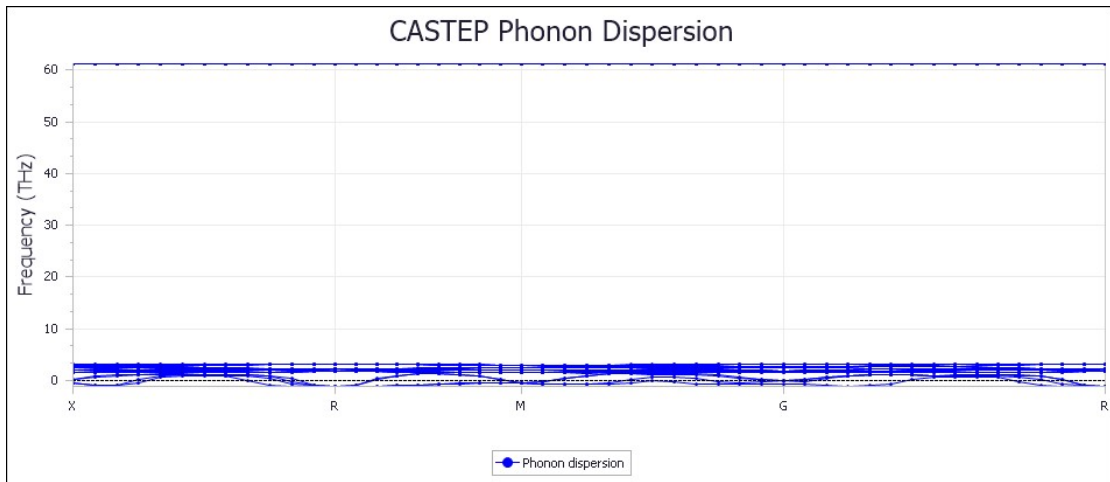

$\alpha$ -N<sub>2</sub> with  $P2_13$  at 0.4 GPa

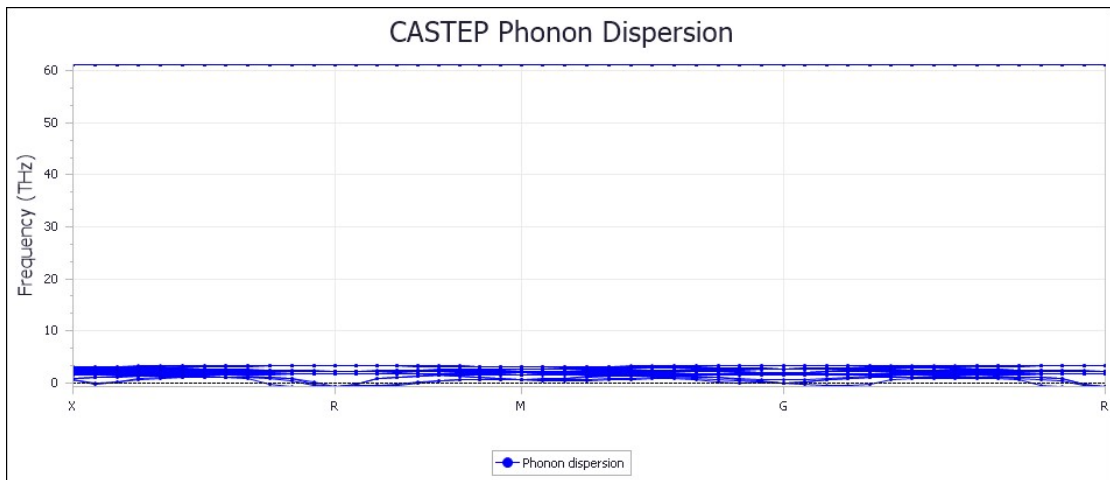

$\alpha$ -N<sub>2</sub> with  $P2_13$  at 0.5 GPa



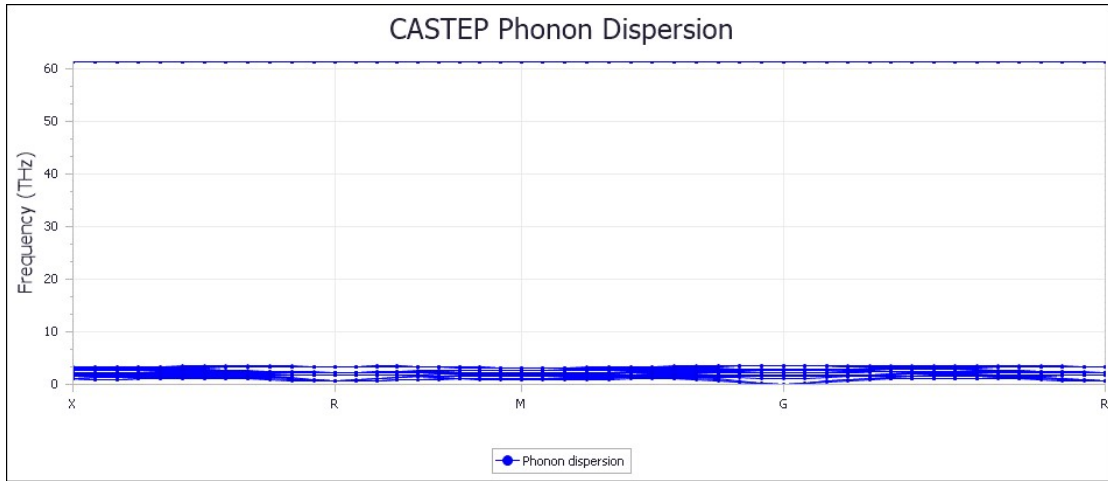

$\alpha$ -N<sub>2</sub> with  $P2_13$  at 0.6 GPa

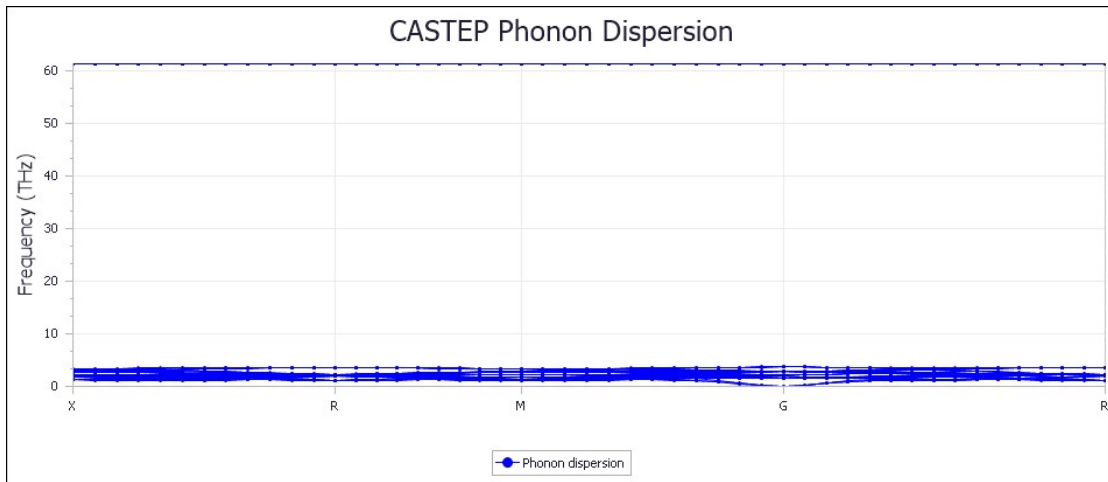

$\alpha$ -N<sub>2</sub> with  $P2_13$  at 0.7 GPa

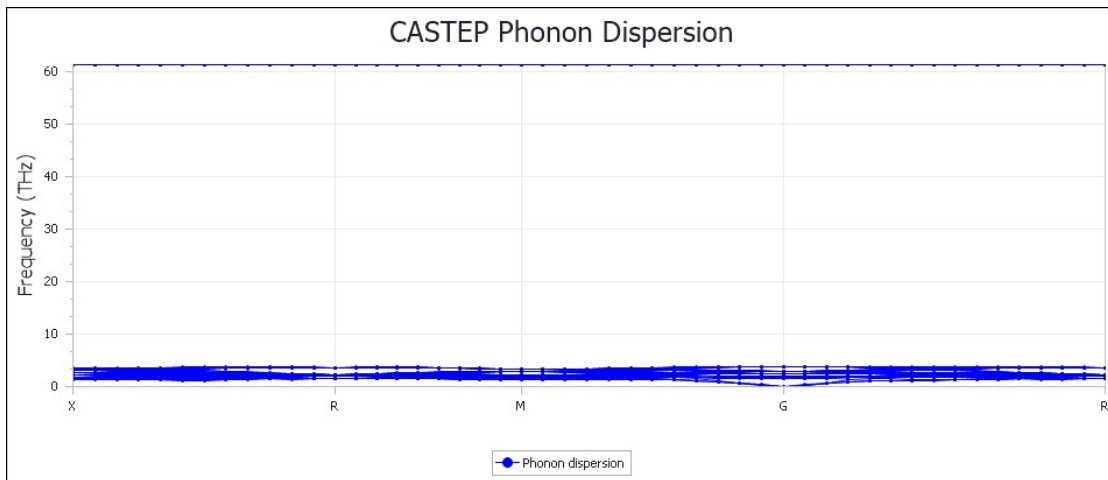

$\alpha$ -N<sub>2</sub> with  $P2_13$  at 0.8 GPa

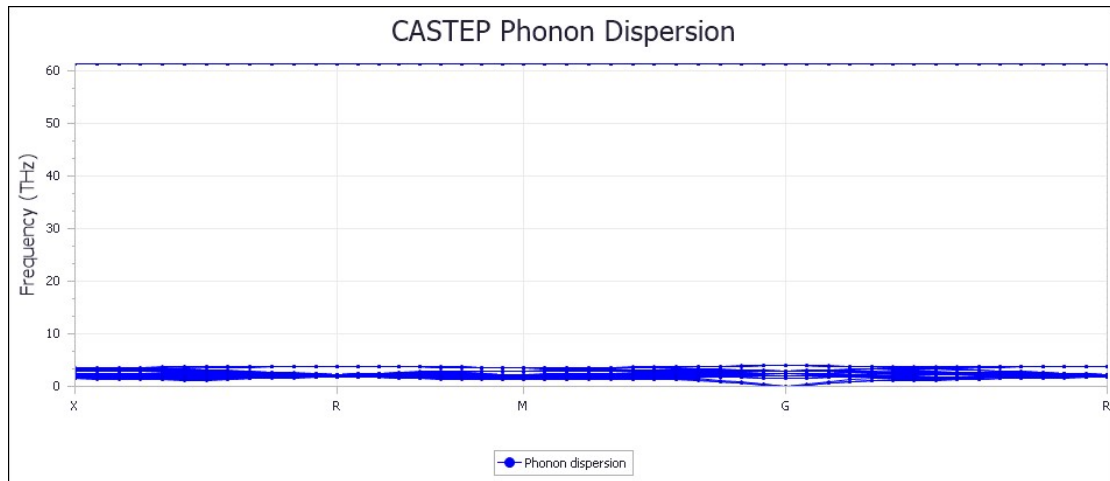

$\alpha$ -N<sub>2</sub> with  $P2_13$  at 0.9 GPa

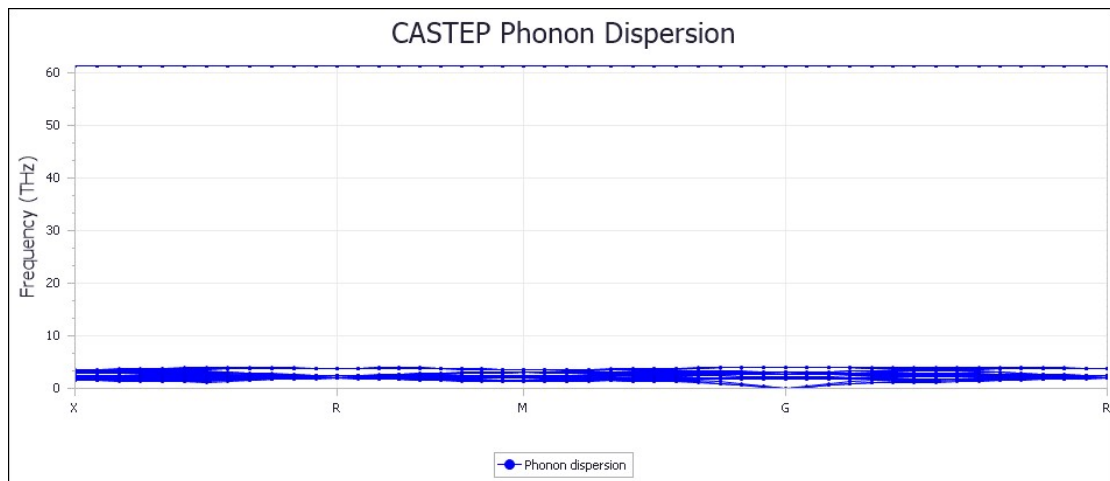

$\alpha$ -N<sub>2</sub> with  $P2_13$  at 1 GPa

**Figure S1** The complete individual phonon spectra of  $\alpha$ -N<sub>2</sub> with (a)  $Pa\bar{3}$  and (b)  $P2_13$  space groups under pressure from 0 GPa to 1 GPa.

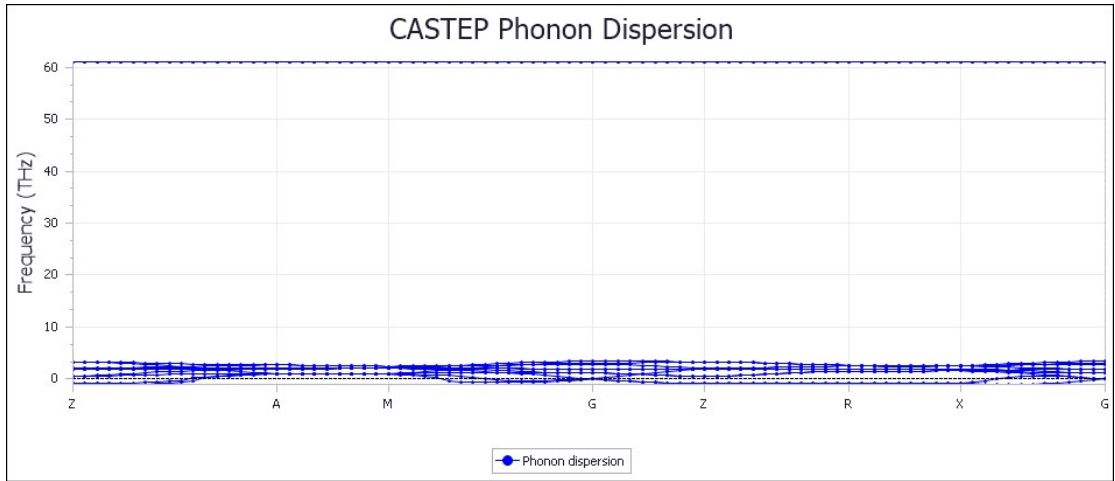

$\gamma$ -N<sub>2</sub> at 0 GPa

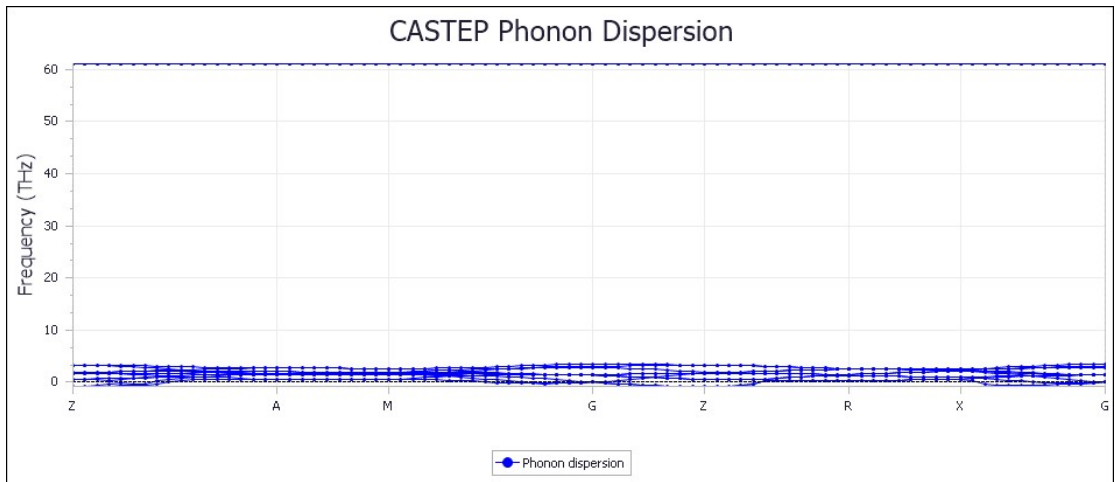

$\gamma$ -N<sub>2</sub> at 0.1 GPa

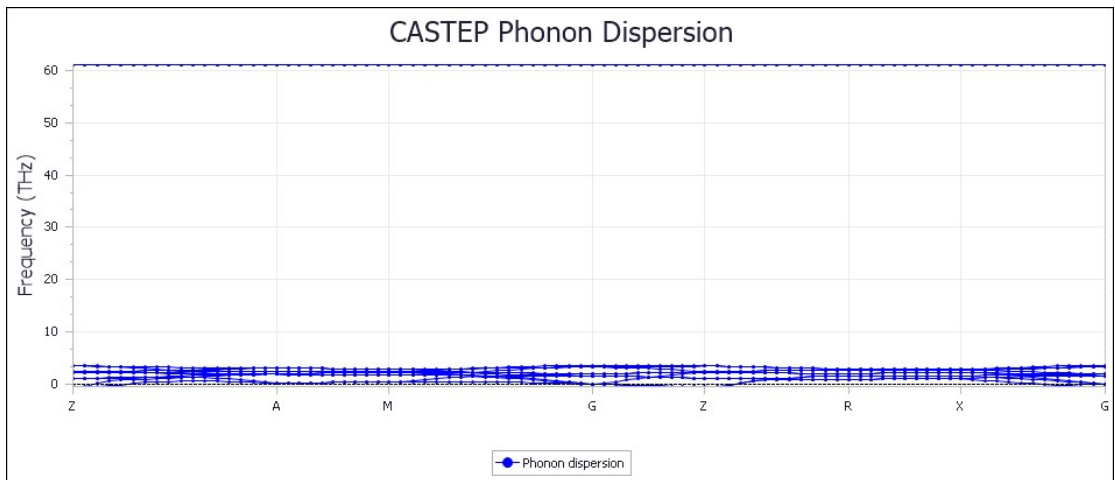

$\gamma$ -N<sub>2</sub> at 0.2 GPa

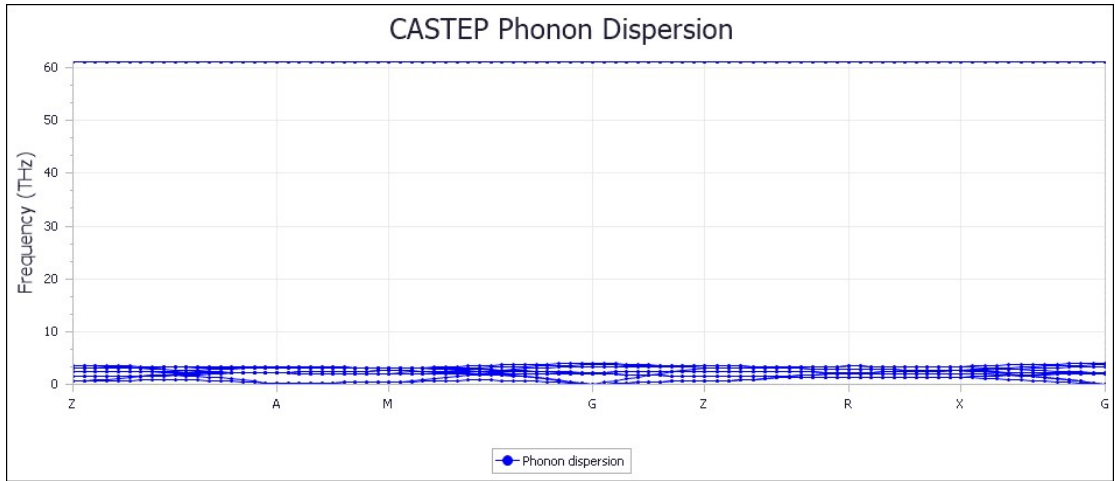

$\gamma$ -N<sub>2</sub> at 0.3 GPa

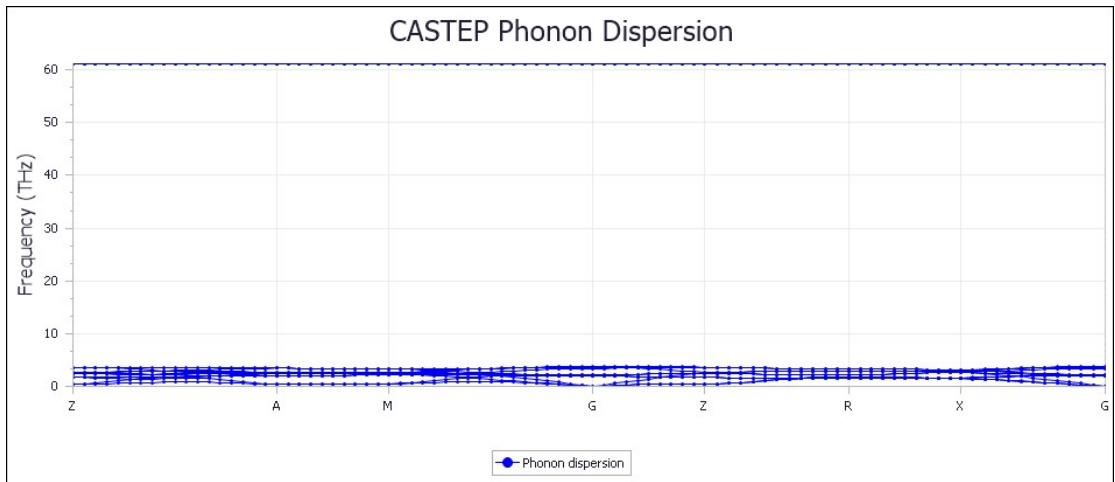

$\gamma$ -N<sub>2</sub> at 0.4 GPa

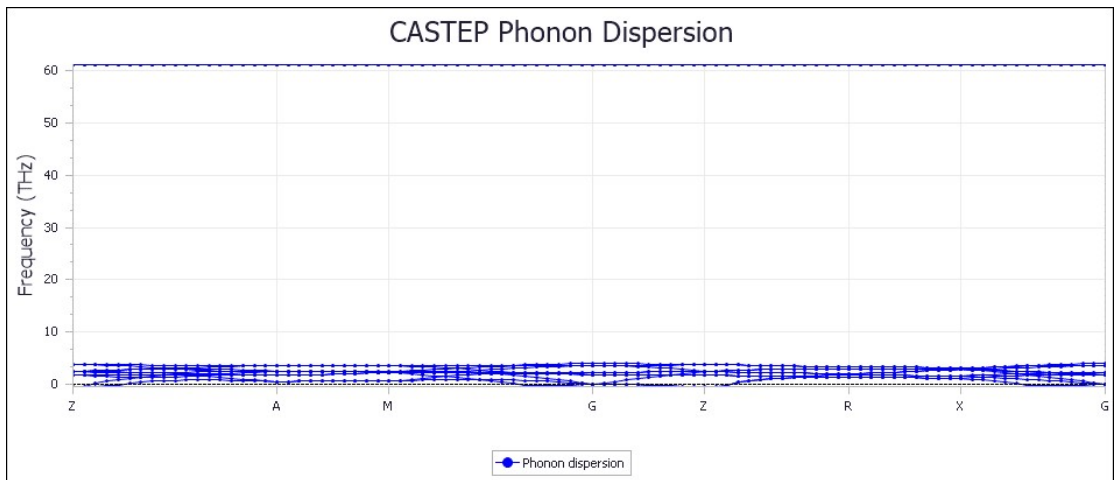

$\gamma$ -N<sub>2</sub> at 0.5 GPa

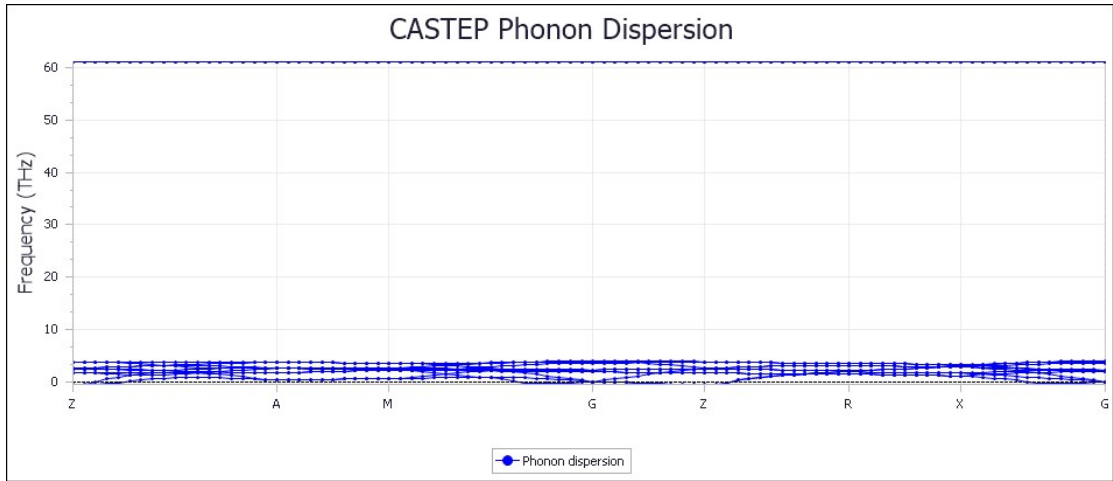

$\gamma$ -N<sub>2</sub> at 0.6 GPa

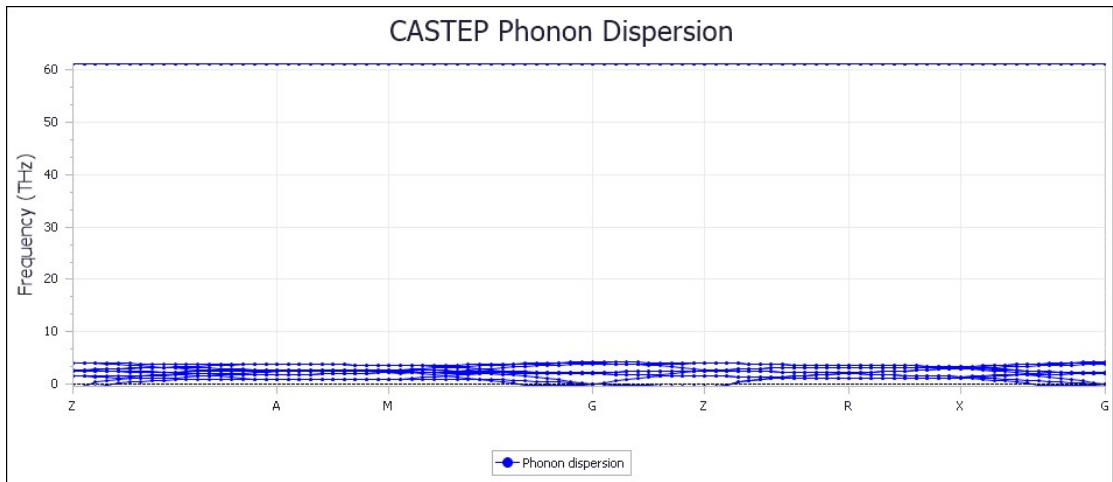

$\gamma$ -N<sub>2</sub> at 0.7 GPa

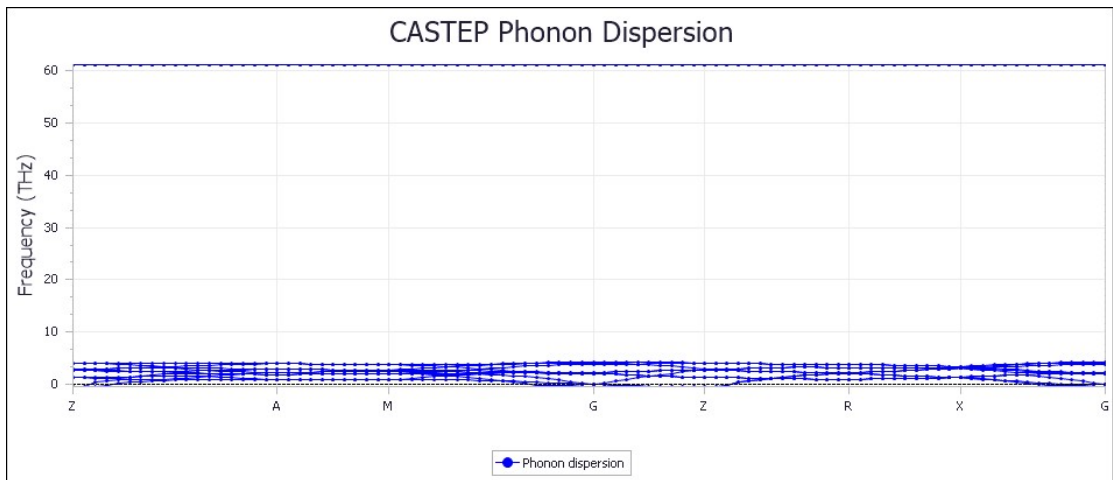

$\gamma$ -N<sub>2</sub> at 0.8 GPa

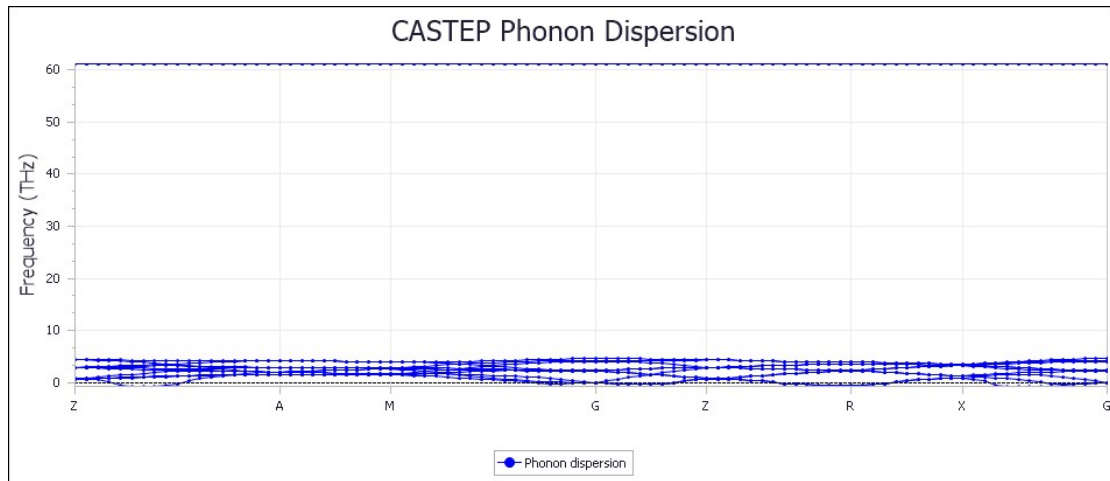

$\gamma$ -N<sub>2</sub> at 0.9 GPa

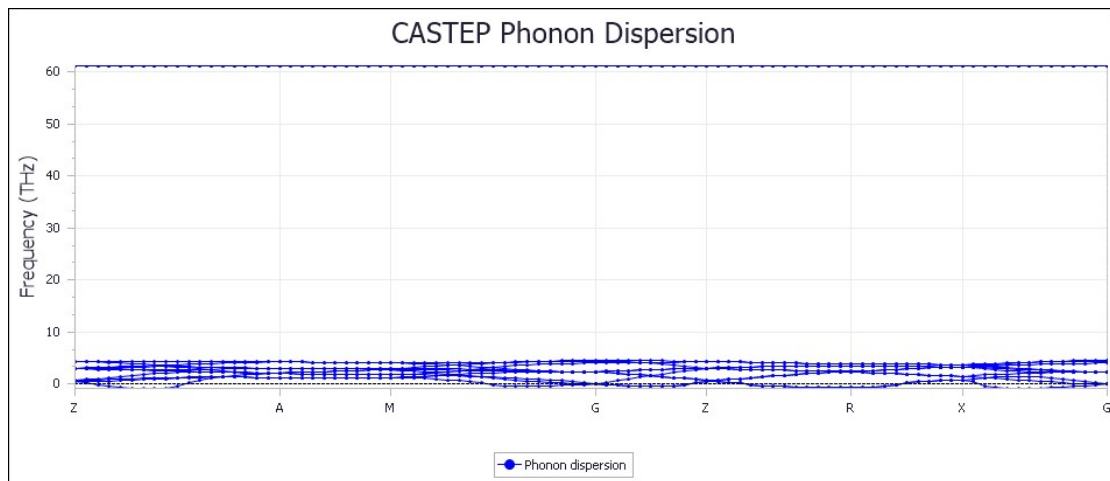

$\gamma$ -N<sub>2</sub> at 1 GPa

**Figure S2** The complete individual phonon spectra of  $\gamma$ -N<sub>2</sub> under pressure from 0 GPa to 1 GPa.
